# Supplementary material for: Salmonella enterica Serovar Typhimurium Exploits Cycling through Epithelial Cells To Colonize Human and Murine Enteroids
Source: PubMed Central journal article supplement (PMC7844539; doi:10.1128/mbio.02684-20), 2021-01-12

Supplementary Figure 3

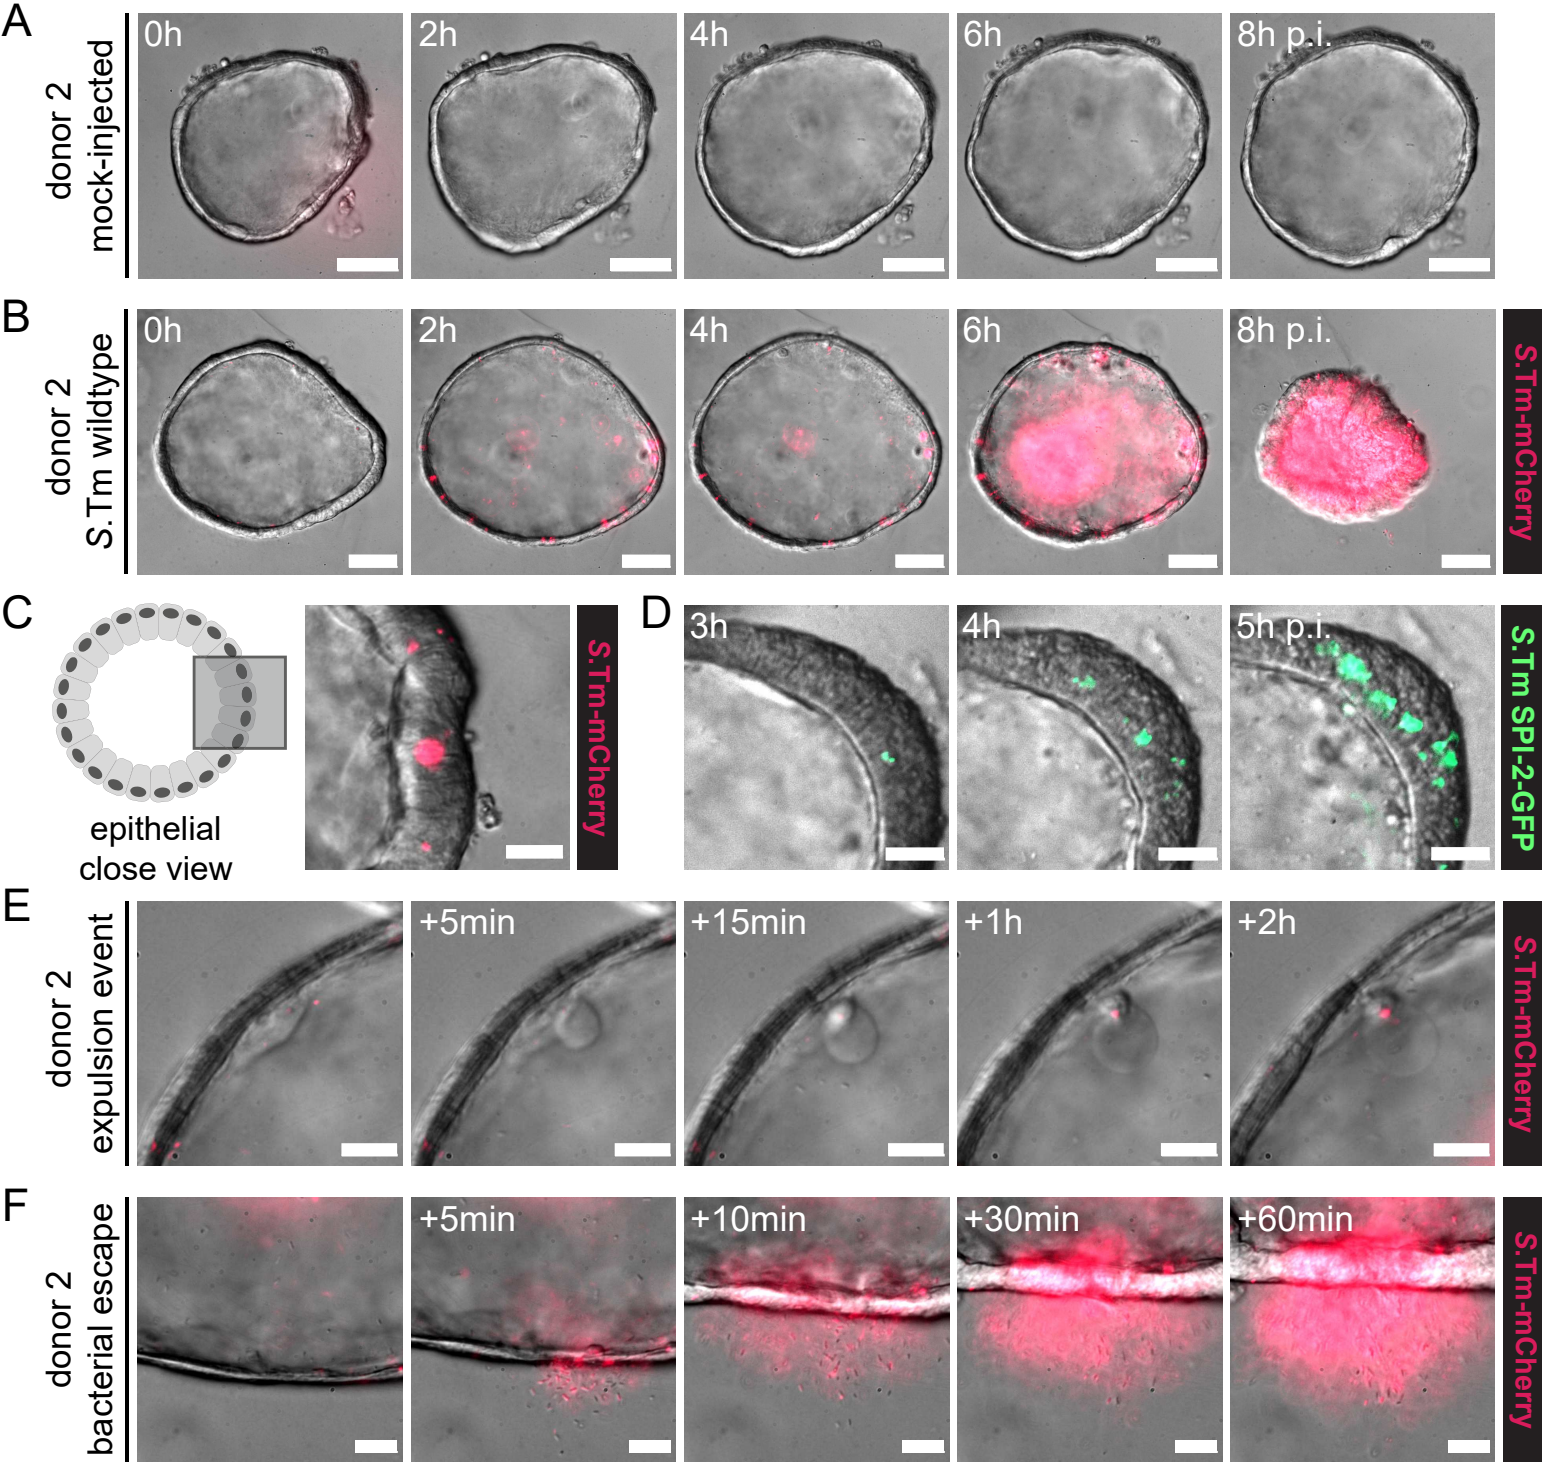

Supplement: mBio.02684-20-sf003.pdf [file mBio.02684-20-sf003.pdf]
